# Supplementary material for: Bioinformatics and Functional Assessment of Toxin-Antitoxin Systems in Staphylococcus aureus
Source: PubMed Central journal article supplement (PMC6266405; doi:10.3390/toxins10110473), 2018-11-14
Supplement: toxins-10-00473-s001.pdf [file toxins-10-00473-s001.pdf]

# Supplementary Materials: Bioinformatics and Functional Assessment of Toxin-Antitoxin Systems in *Staphylococcus aureus*

Gul Habib, Qing Zhu and Baolin Sun

**Table S1.** List of all bacterial strains, vectors, and primers used in this study. The lower case letters represent restriction enzyme sites.

| Strain                        | Relevant Genotype                                                                                                                                     | Source               |
|-------------------------------|-------------------------------------------------------------------------------------------------------------------------------------------------------|----------------------|
| <i>S. aureus</i> strains      |                                                                                                                                                       |                      |
| <i>S. aureus</i> WT<br>RN4220 | Methicillin-resistant <i>S. aureus</i> MW2<br><i>S. aureus</i> restriction modification deficient strain                                              | NARSA<br>NARSA       |
| <i>E. coli</i> strains        |                                                                                                                                                       |                      |
| Trans T1<br>BL21(DE3)         | Clone host strain for transformation<br>Expression strain for recombinant proteins                                                                    | TransGen<br>TransGen |
| <b>Plasmids</b>               |                                                                                                                                                       |                      |
| pRMC2<br>pET28a (+)           | Shuttle vector, anhydrotetracycline inducible,<br>Amp <sup>r</sup> , Chl <sup>r</sup><br>Expression vector with a hexahistidine tag, Kan <sup>r</sup> | Addgene<br>Addgene   |
| Primer name                   | Oligonucleotide (5'-3')                                                                                                                               | Application          |
| Pet2329-F-NdeI                | GCGcatatgGCTAGGTTAAATATTA                                                                                                                             | Toxin induction      |
| Pet2329-R- EcoRI              | GCGgaattcTTAATAATGGTATTTAC                                                                                                                            | Toxin induction      |
| Pet2330-F-NdeI                | GCGcatatgATTATTA AAAATTATTC                                                                                                                           | Antitoxin induction  |
| Pet2330-R- XhoI               | GCGctcgagTTATACATCTATATCTT                                                                                                                            | Antitoxin induction  |
| Pet2380-F-NdeI                | GCGcatatgAGCAATTACACGGTTAA                                                                                                                            | Toxin induction      |
| Pet2380-R- EcoRI              | GCGgaattcTTAATCATAATGTGACC                                                                                                                            | Toxin induction      |
| Pet2381-F-NdeI                | GCGcatatgATTATCACTAGCCCTA                                                                                                                             | Antitoxin induction  |
| Pet2381-R- XhoI               | GCGctcgagTTAAAGATTATCCCAATC                                                                                                                           | Antitoxin induction  |
| Pet1992-F-NdeI                | GCGcatatgATTAGACGAGGAGATGT                                                                                                                            | Toxin induction      |
| Pet1992-R- EcoRI              | GCGgaattcCTAATTTTTCTGGTGAG                                                                                                                            | Toxin induction      |
| Pet1993-F-BamHI               | GCGggtaccATGTTATCTTTTAGTCA                                                                                                                            | Antitoxin induction  |
| Pet1993-R- EcoRI              | GCGgaattcTCATTCATTCGTTGAA                                                                                                                             | Antitoxin induction  |
| Pet1419-F-NdeI                | GCGcatatgAATAATCGTGAACAAA                                                                                                                             | Toxin induction      |
| Pet1419-R- EcoRI              | GCGgaattcCTAATACTCATTTTCCTG                                                                                                                           | Toxin induction      |
| Pet1418-F-NdeI                | GCGcatatgAGTATTAGTGTAGGAGA                                                                                                                            | Antitoxin induction  |
| Pet1418-R- EcoRI              | GCGgaattcTCACTCGTCCCCCTTAA                                                                                                                            | Antitoxin induction  |
| PR1888-F-KpnI                 | GCGggtaccAGCCGTCTATTTGATATT                                                                                                                           | Toxin induction      |
| PR1888-R-EcoRI                | GCGgaattcTTAATCTAAAATAGCC                                                                                                                             | Toxin induction      |
| PR2354-F-KpnI                 | GCGggtaccAGGAGGTGTATGACG                                                                                                                              | Toxin induction      |
| PR2354-R-EcoRI                | GCGgaattcTTATTTGTCACCTTT                                                                                                                              | Toxin induction      |
| PR1381-F-KpnI                 | GCGggtaccAGGAGCAAACAATG                                                                                                                               | Toxin induction      |
| PR1381-R-EcoRI                | GCGgaattcCTACCCTAAATCATTTG                                                                                                                            | Toxin induction      |
| Biotn-F-67                    | ATCTCGAAAAATATTTTT                                                                                                                                    | Gel shift assay      |
| Biotn-R-67                    | TTCAAATTTACCTCCGTTTT                                                                                                                                  | Gel shift assay      |
| RT-F- <i>clpP</i>             | CTAGGAGACATCAGTGAA                                                                                                                                    | qRT-PCR              |
| RT-R- <i>clpP</i>             | CACTCATAGCGATAACAC                                                                                                                                    | qRT-PCR              |
| RT-F- <i>clpX</i>             | CGTCGAAGAAGAATTAGC                                                                                                                                    | qRT-PCR              |

---

|                   |                      |                  |
|-------------------|----------------------|------------------|
| RT-R- <i>clpX</i> | TGGTCCTAATTGTTGAATAC | qRT-PCR          |
| Trans-F-36        | GCGGAAATAGGTAAATT    | Co-transcription |
| Trans-R-37        | TATATTGTTCTATTGC     | Co-transcription |
| Trans-F-29        | ACAAAAGTAAATGATGA    | Co-transcription |
| Trans-R-30        | TCGTGATTGATACGTC     | Co-transcription |

---
